# Supplementary material for: Prophylactic vaccines are potent activators of monocyte-derived dendritic cells and drive effective anti-tumor responses in melanoma patients at the cost of toxicity
Source: Springer Nature journal article supplement (doi:10.1007/s00262-016-1796-7), 2016-02-10
Supplement: 262_2016_1796_MOESM1_ESM.pdf [file 262_2016_1796_MOESM1_ESM.pdf]

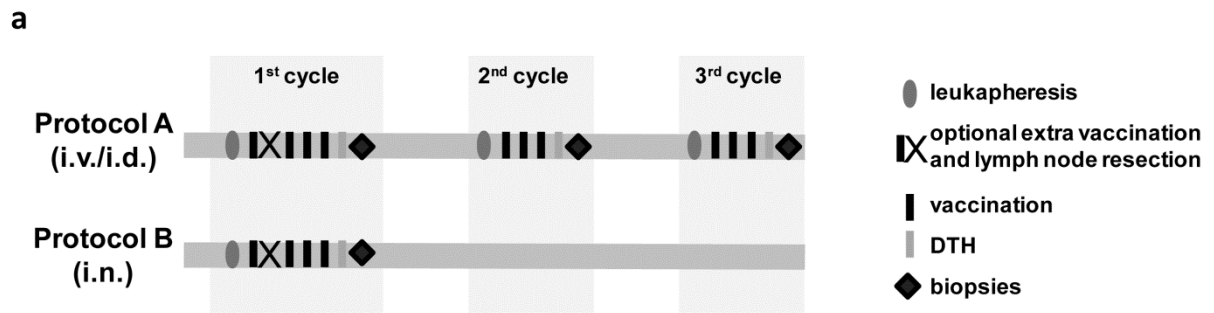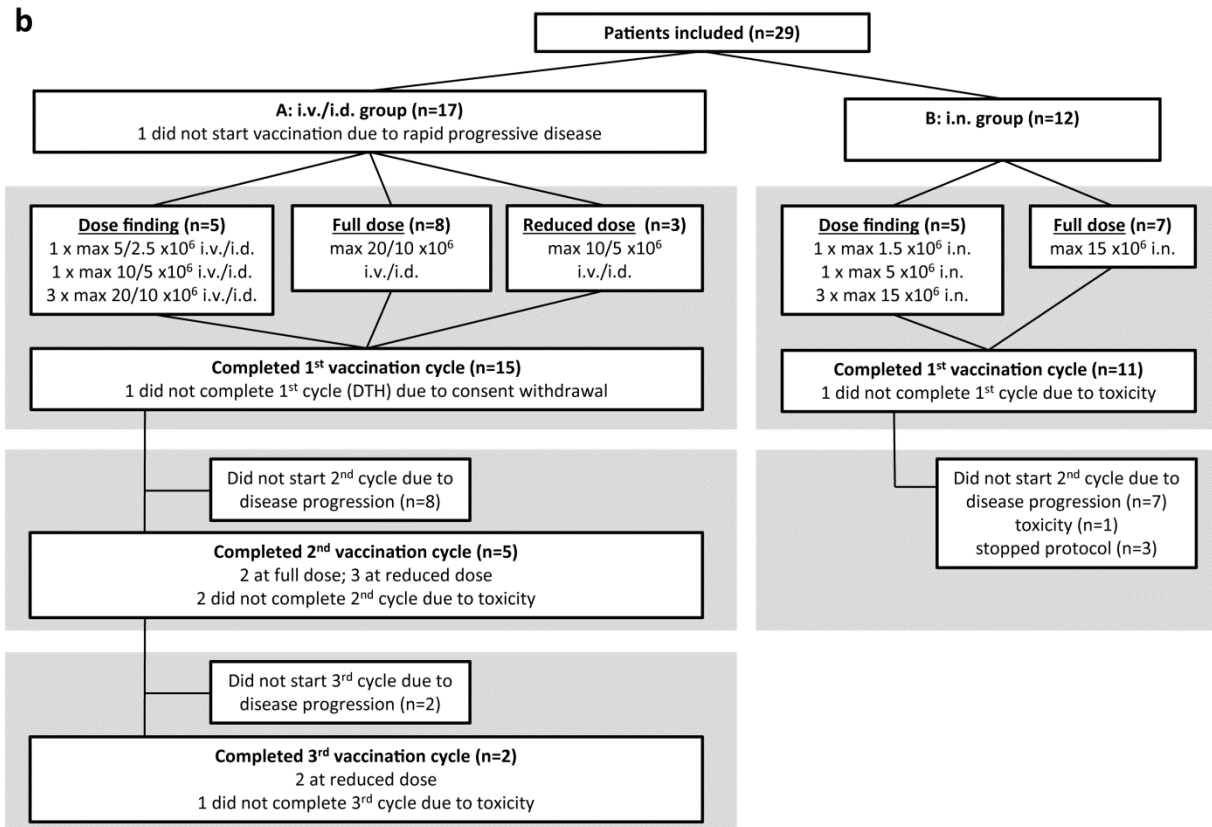

**Supplementary Figure 1. Schematic treatment schedule and CONSORT flow chart**

(a) Schematic treatment schedule. (b) CONSORT flow chart.

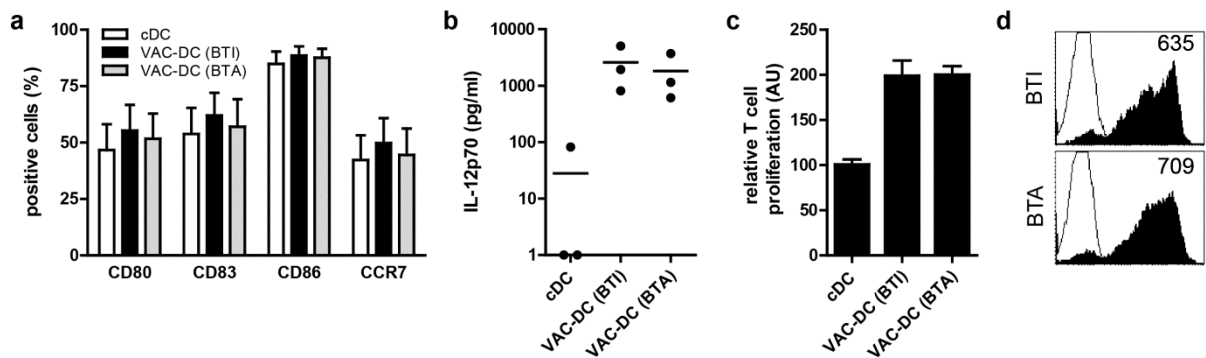

## Supplementary Figure 2. Prophylactic vaccine maturation cocktail with Influvac compared to with Act-HIB

Monocyte-derived DC were matured for 48h with the conventional cytokine cocktail (cDC; IL-1 $\beta$ , IL-6, TNF $\alpha$ , PGE $_2$ ), or with either prophylactic vaccine cocktail BTI (BCG, Typhim, Influvac) or cocktail BTA (BCG, Typhim, Act-HIB) with PGE $_2$ . **(a)** The expression of maturation markers CD80, CD83, CD86, and CCR7 was measured by flow cytometry. Results are shown as percentage of positive cells. The figures show mean  $\pm$  SEM of three experiments with different donors. **(b)** IL-12p70 production was measured by ELISA in the supernatant of DC cultures 48h after maturation. Per condition each symbol represents one donor. Means are shown for each maturation cocktail. **(c)** The allostimulatory capacity of the DC was tested in a mixed lymphocyte reaction. Allogeneic peripheral blood leukocytes were co-cultured with differently matured DC and T cell proliferation was measured by incorporation of tritiated thymidine. The graph represents mean  $\pm$  SEM counts per minute relative to cDC of three experiments with different donors, performed in triplicate. **(d)** DC were electroporated with mRNA encoding gp100. After 3h, gp100 protein expression was determined by FACS analysis. Filled curves show staining with specific antibody; thin-lined curves show the isotype control. Numbers indicate mean fluorescence intensity.

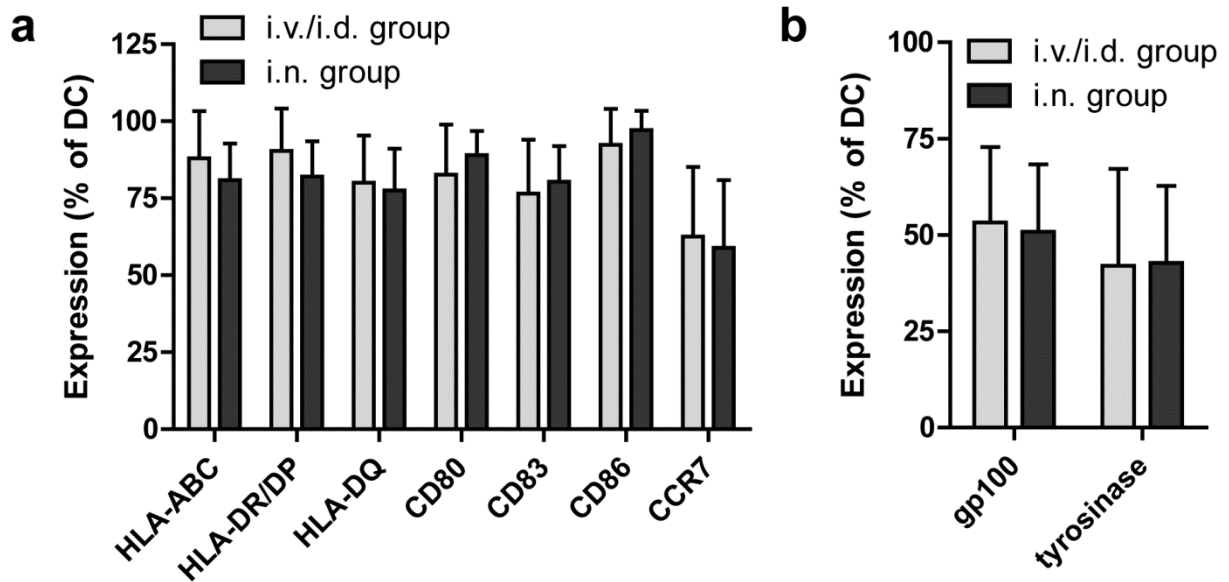

**Supplementary Figure 3. Vaccine characteristics of first cycle of all patients**

(a) Expression of HLA-ABC, HLA-DR/DP, HLA-DQ, CD80, CD83, CD86, and CCR7 was analyzed by flow cytometry. (b) Tumor antigen expression by VAC-DC 2-4h after electroporation with mRNA encoding gp100 and tyrosinase. Data are shown as percentage of positive VAC-DC used for the first vaccination. The graphs represent mean  $\pm$  SD of all patients. Data is shown separately for each administration route; intravenous/intradermal (i.v./i.d.) and intranodal (i.n.) injection of VAC-DC.

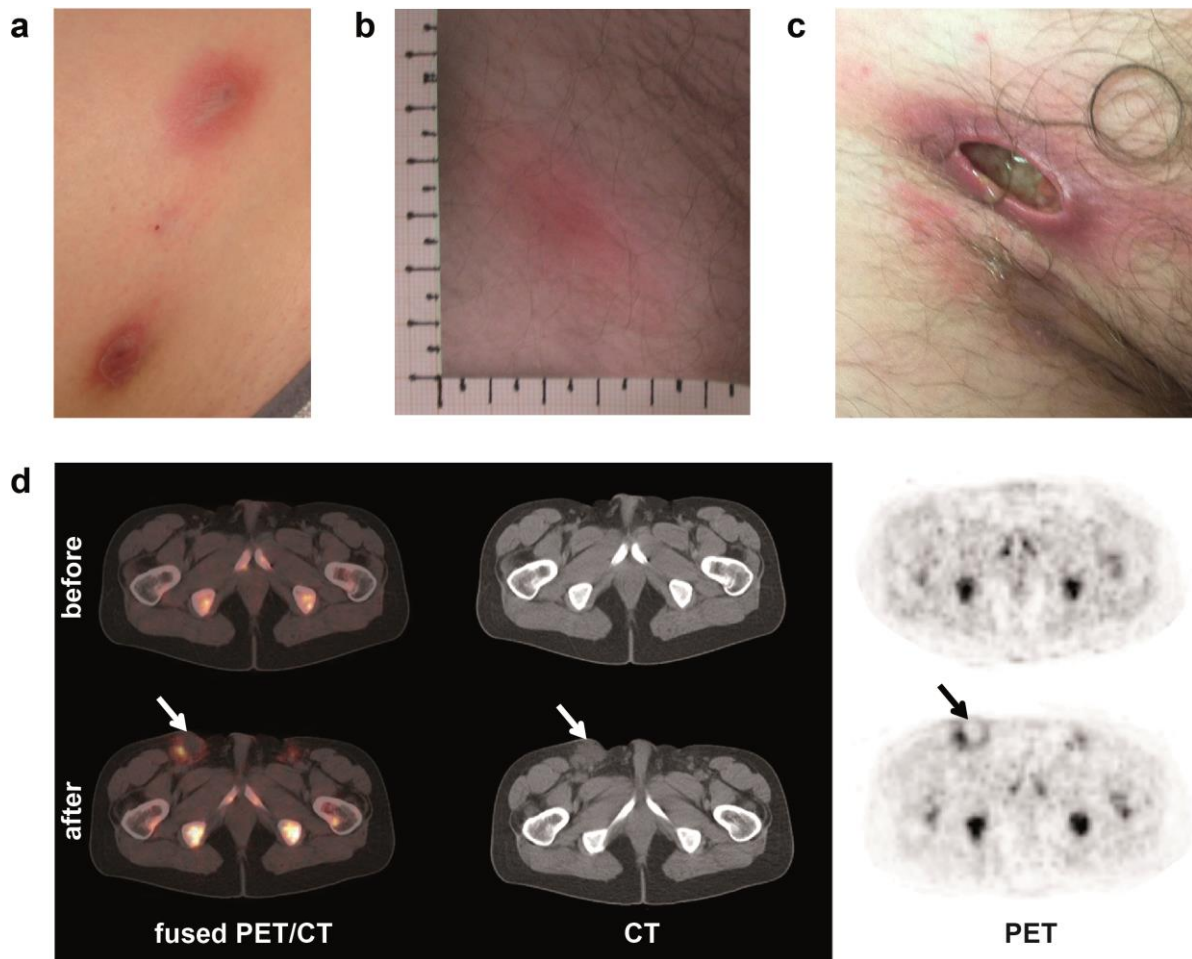

#### Supplementary Figure 4. Injection site reactions

(a) Example of injection site reaction (patient A-11) after intradermal injection with VAC-DC. (b) Induration of the injection site after regular flu vaccination (patient A-3). Showing redness over an area with a diameter of 3 to 4 cm. (c) Example of injection site reaction (patient B-12) after intranodal injection with VAC-DC, showing substantial swelling of the lymph node (region), redness of the overlying skin and discharge of pus. (d) [ $^{18}\text{F}$ ]FLT-PET/CT scan of patient B-12 showing profound lymphadenopathy of the right inguinal lymph nodes after intradermal injection with VAC-DC, with moderately increased [ $^{18}\text{F}$ ]FLT accumulation in the rim and absent tracer accumulation in the centre, suggestive of necrosis (arrow).
